# Supplementary material for: Non-covalent dispersion of multi-walled carbon nanotubes in aqueous solution with hyperbranched polyethylene-g-poly(methacrylic acid)
Source: Royal Society of Chemistry journal article supplement (doi:10.1039/c5ra27379j), 2016-01-01
Supplement: c5ra27379j1.pdf [file c5ra27379j1.pdf]

## Electronic Supplementary Information

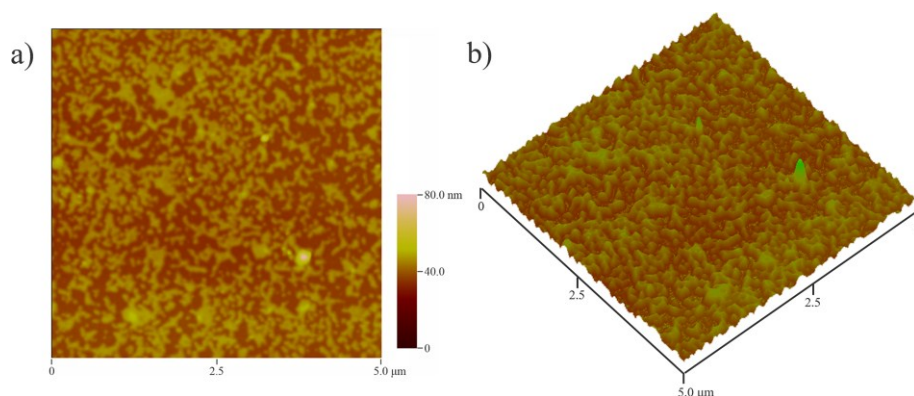

Fig. S1. AFM height images (2D model (a) and 3D model (b)) of HBPE-g-PMAA in aqueous solution with a concentration of 0.25 mg/mL.

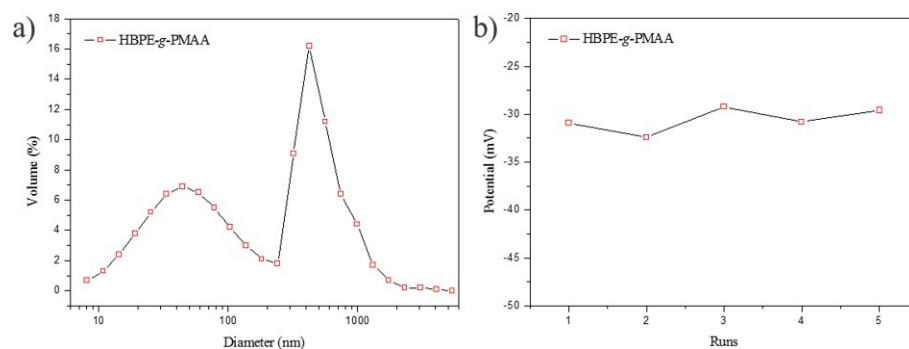

Fig. S2. a) Diameter distributions by volume from LLS of HBPE-g-PMAA in aqueous solution and b) Zeta potential of HBPE-g-PMAA in aqueous solution.

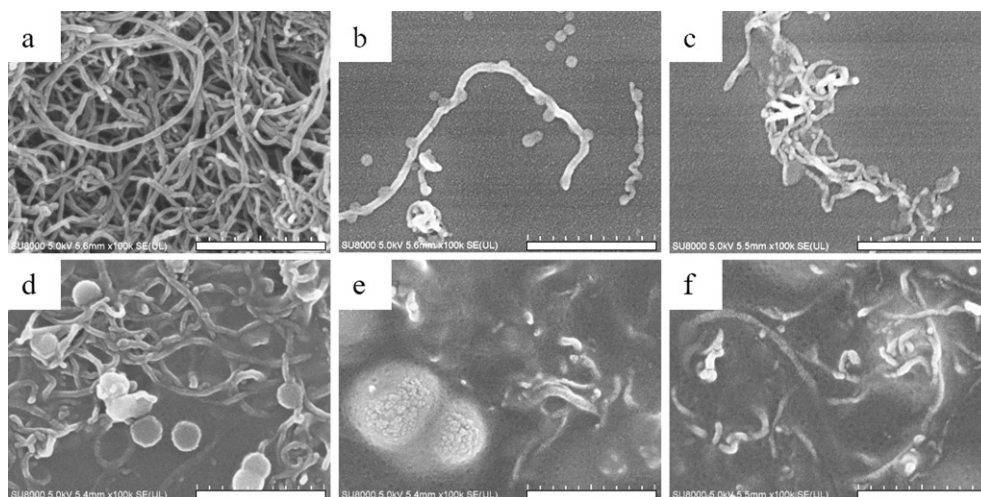

Fig. S3. SEM images of pristine MWCNTs (a) and MWCNTs dispersed by HBPE-g-PMAA with different mass ratio of HBPE-g-PMAA/MWCNTs. 0.25 (b), 0.5 (c), 1.0 (d), 2.0 (e) and 5.0 (f). Scale bar: 500 nm.
